# Supplementary material for: Chemical Constituents of Supercritical Extracts from Alpinia officinarum and the Feeding Deterrent Activity against Tribolium castaneum
Source: MDPI journal article supplement (doi:10.3390/molecules22040647), 2017-04-18
Supplement: s1 [file s1]

**Supplementary File.** The MS,  $^1\text{H}$ ,  $^{13}\text{C}$  and 2D NMR spectra of the new compound **3**.

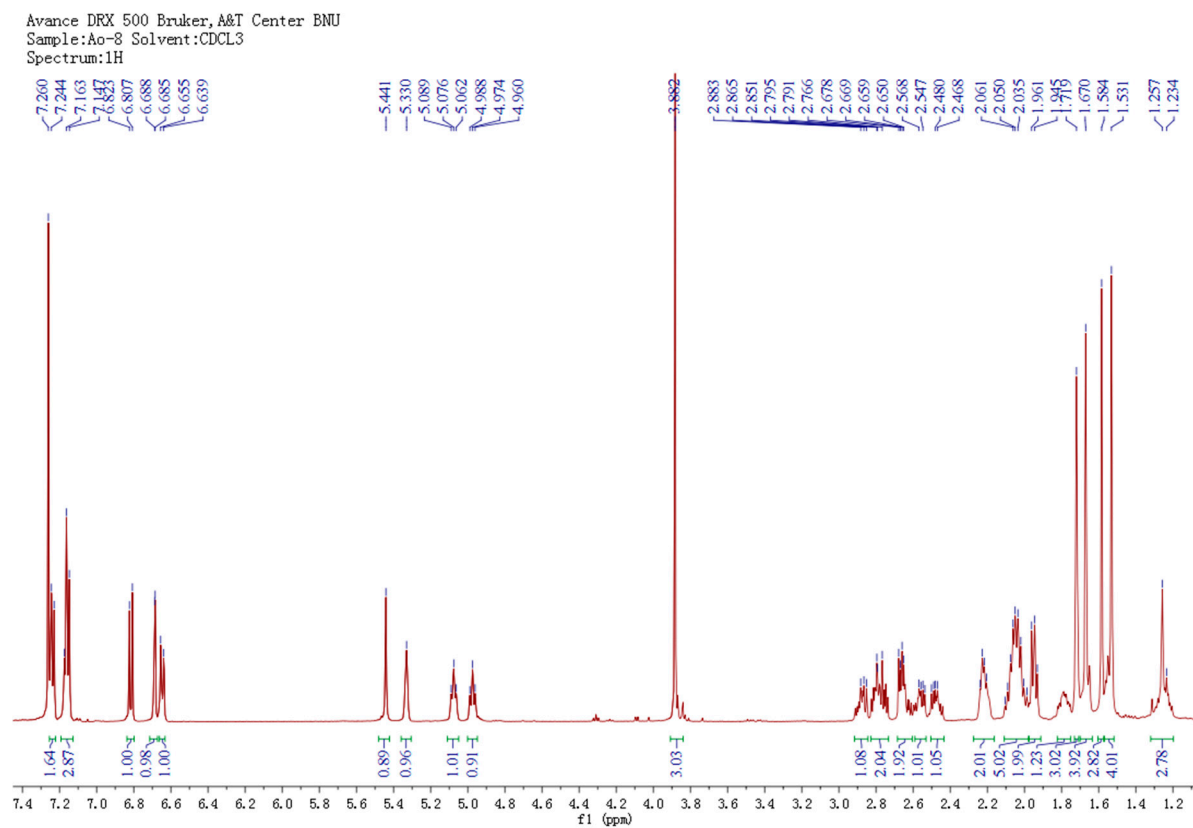

**Figure 1S.**  $^1\text{H}$ -NMR spectrum of compound **3** (CDCl<sub>3</sub>).

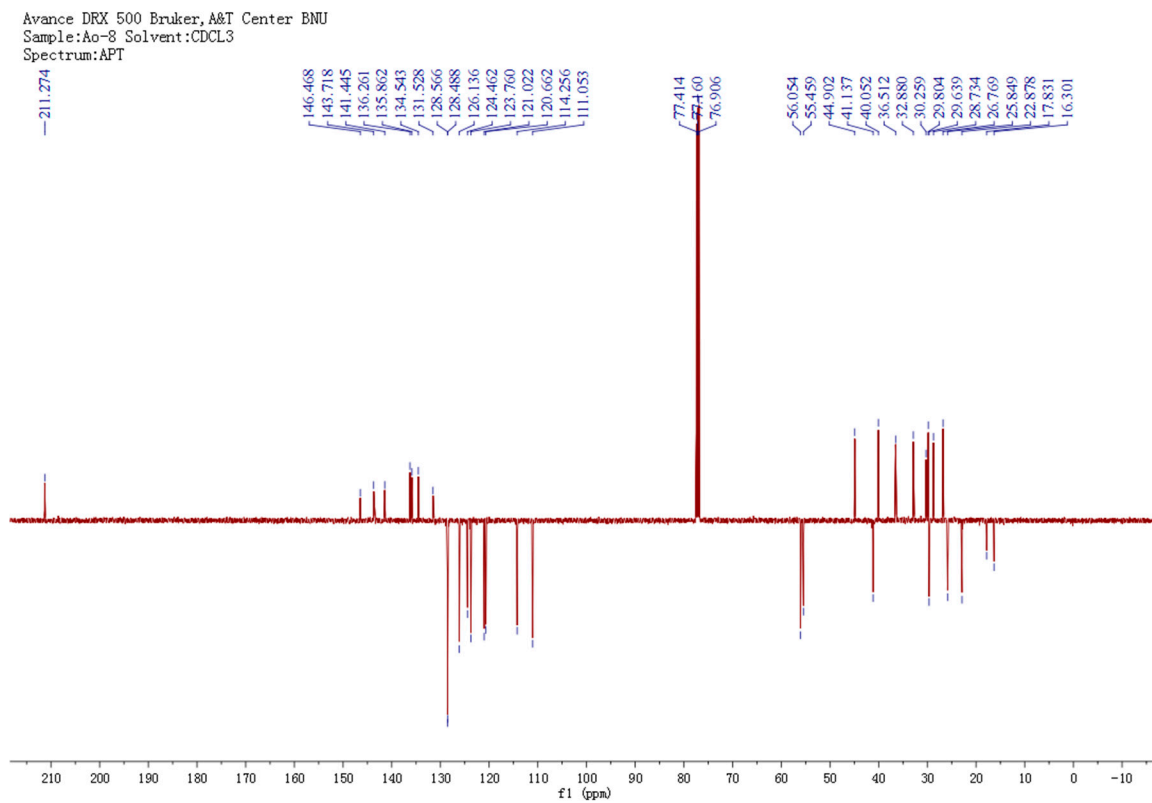

**Figure 2S.** APT spectrum of compound **3** (CDCl<sub>3</sub>).

Avance DRX 500 Bruker, A&T Center BNU  
Sample: Ao-8 Solvent: CDCl<sub>3</sub>  
Spectrum: H-H COSY

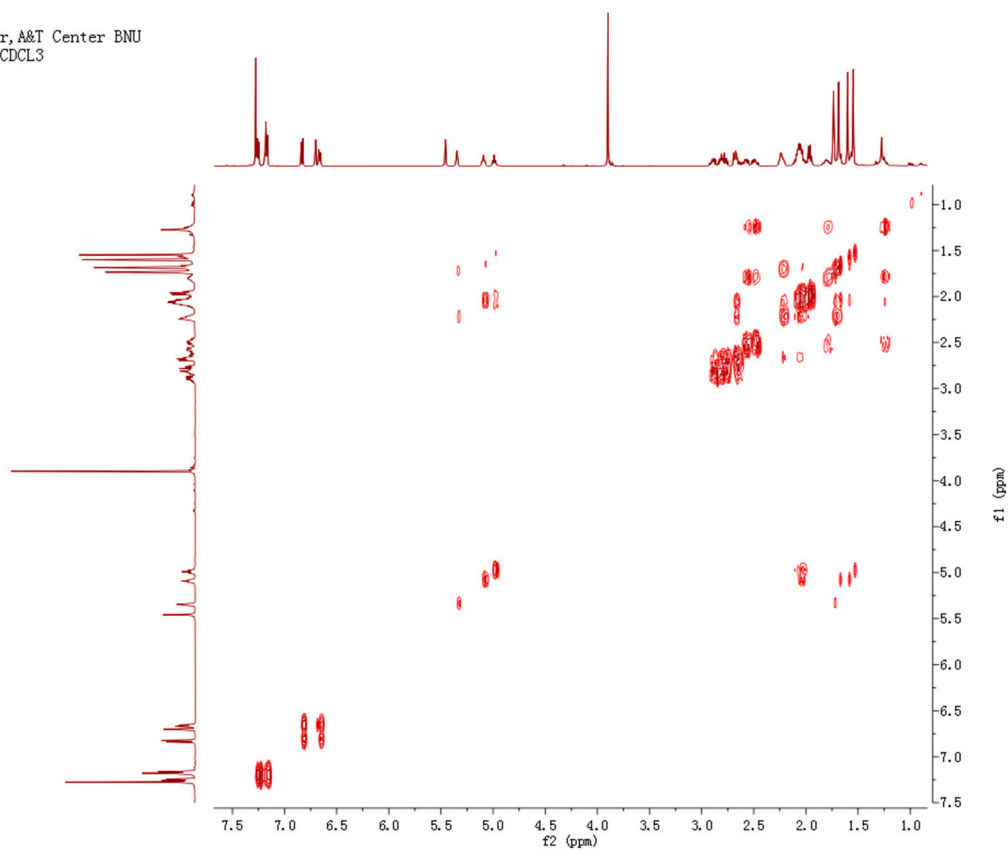

**Figure 3S.** H-H COSY spectrum of compound **3** (CDCl<sub>3</sub>).

Avance DRX 500 Bruker, A&T Center BNU  
Sample: Ao-8 Solvent: CDCl<sub>3</sub>  
Spectrum: HSQC

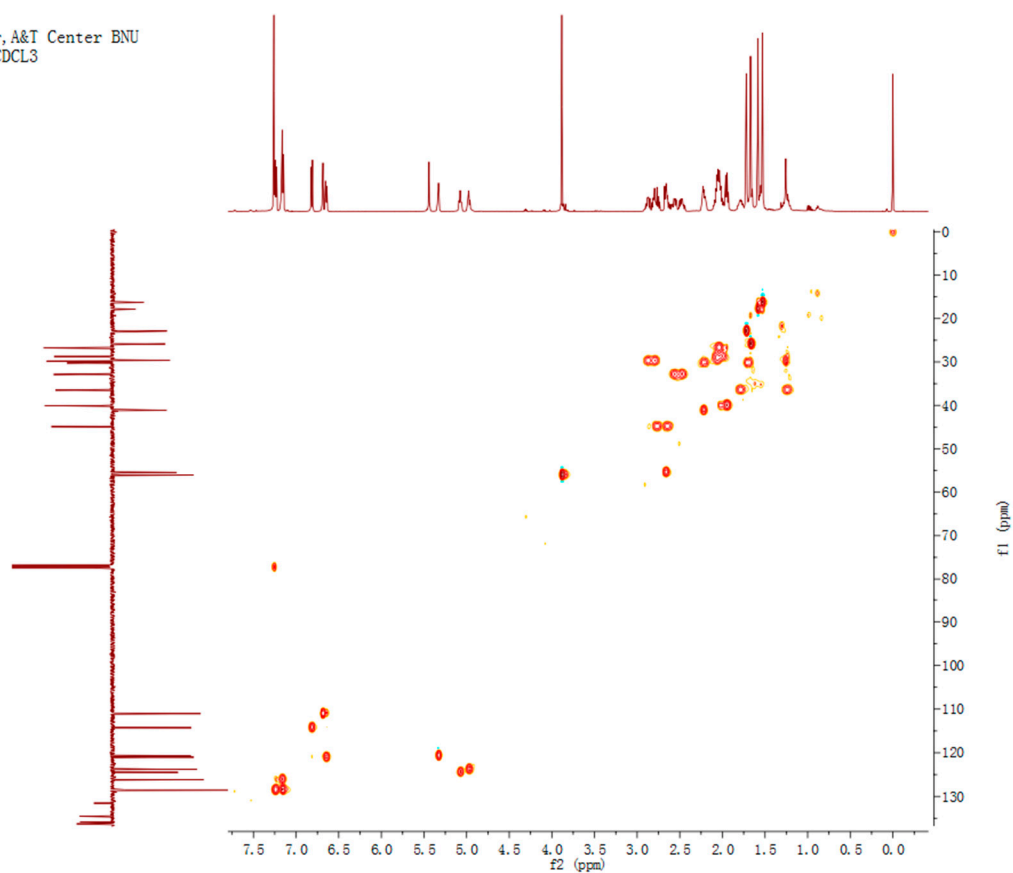

**Figure 4S.** HSQC spectrum of compound **3** (CDCl<sub>3</sub>).

Avance DRX 500 Bruker, A&T Center BNU  
Sample: Ao-8 Solvent: CDCl<sub>3</sub>  
Spectrum: HMBc

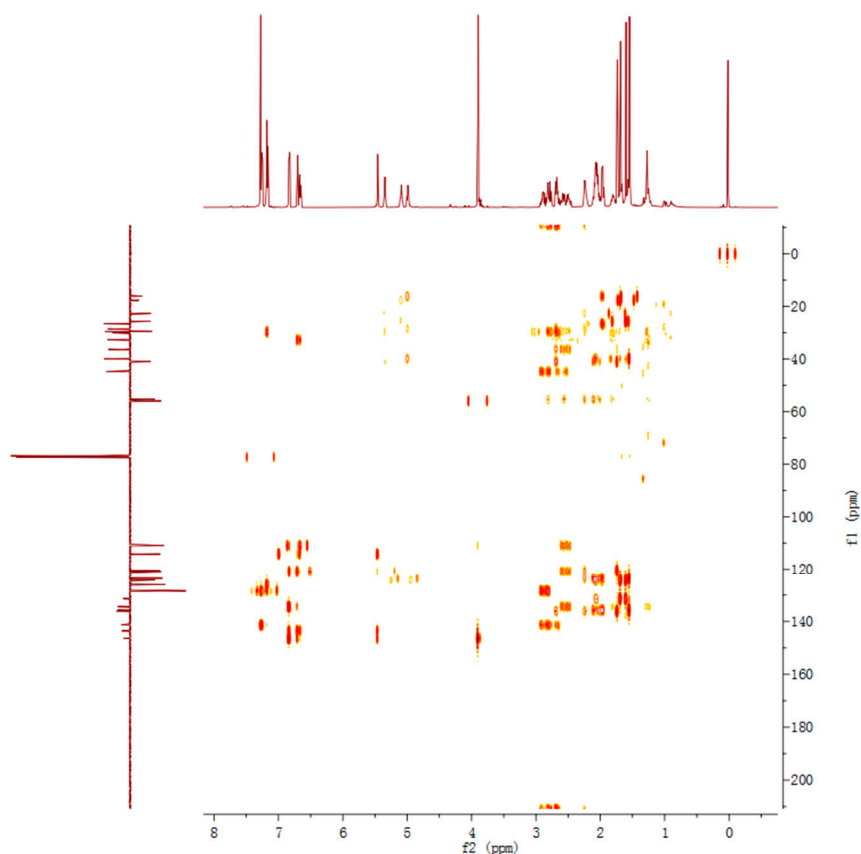

Figure 5S. HMBc spectrum of compound **3** (CDCl<sub>3</sub>).

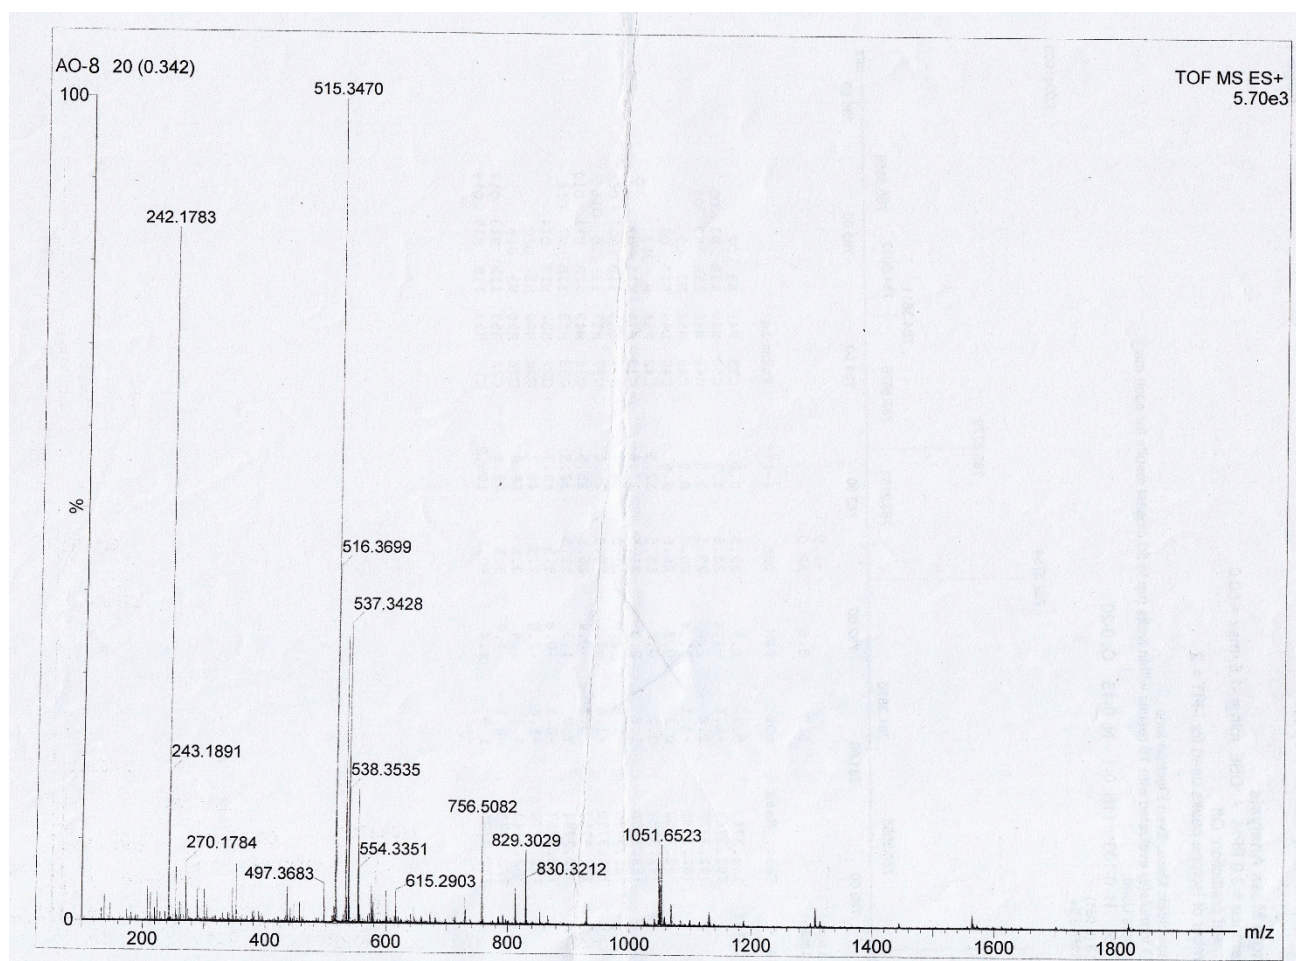

Figure 6S. ESIMS spectrum of compound **3** (CDCl<sub>3</sub>).
